# Supplementary material
Source: PubMed Central journal article supplement (PMC1236647)
Supplement: jbacter_187_18_6300__1.pdf [file jbacter_187_18_6300__1.pdf]

TABLE S1. Genes differentially expressed in aerobically grown  $\Delta qcrCAB::hyg$  mutant of *M. smegmatis*

| ID <sup>a</sup>          | Gene         | TIGR annotation <sup>b</sup> | Function <sup>c</sup>                           | M <sup>d</sup> | P value | Class <sup>e</sup> |
|--------------------------|--------------|------------------------------|-------------------------------------------------|----------------|---------|--------------------|
| <b>Upregulated genes</b> |              |                              |                                                 |                |         |                    |
| ribA                     | <i>ribA2</i> | MSMEG3082                    | Probable riboflavin biosynthesis protein        | -2.301         | 0.0020  | 7                  |
| ML2274                   |              | MSMEG3498                    | Probable conserved secreted protein             | -1.914         | 0.0072  | 3                  |
| mihF                     | <i>mihF</i>  | MSMEG3063                    | Putative integration host factor                | -1.764         | 0.0003  | 2                  |
| glgC                     | <i>glgC</i>  | MSMEG5067                    | glucose-1-phosphate adenylyl-transferase        | -1.753         | 0.0072  | 7                  |
| ML1835                   |              | MSMEG6527                    | CHP                                             | -1.556         | 0.0030  | 10                 |
| ML0510                   |              | MSMEG3035                    | CHP                                             | -1.444         | 0.0004  | 10                 |
| ML0886                   |              | MSMEG4257                    | possible glycosyl transferase                   | -1.430         | 0.0024  | 7                  |
| ML1312                   |              | MSMEG4598                    | CHP                                             | -1.229         | 0.0001  | 10                 |
| argD-g                   | <i>argD</i>  | MSMEG2446                    | probable acetylornithine aminotransferase       | -1.027         | 0.0033  | 7                  |
| gabD-q                   | <i>gabD</i>  | MSMEG2554                    | probable aldehyde dehydrogenase (NAD-dependent) | -1.005         | 0.0052  | 7                  |
| Rv3134c                  | <i>uspL</i>  | MSMEG5230                    | Universal stress protein                        | -0.990         | 0.0098  | 10                 |
| Rv1623c                  | <i>cydA</i>  | MSMEG3243                    | Cytochrome <i>bd</i> oxidase subunit I          | -0.931         | 0.0069  | 7                  |
| ML1926                   |              | MSMEG0828                    | putative tuberculin-related protein             | -0.915         | 0.0058  | 3                  |
| Rv1592c                  |              | MSMEG3205                    | CHP                                             | -0.878         | 0.0016  | 10                 |
| ML1783                   |              | MSMEG4344                    | possible transcriptional regulatory protein     | -0.849         | 0.0080  | 9                  |
| PPE-b                    | <i>PPE</i>   | MSMEG0063                    | PPE family domain                               | -0.807         | 0.0003  | 6                  |
| ML0663                   |              | MSMEG2085                    | CHP                                             | -0.804         | 0.0016  | 10                 |
| argD-e                   | <i>argD</i>  | MSMEG2971                    | probable acetylornithine aminotransferase       | -0.767         | 0.0030  | 7                  |
| atpH                     | <i>atpH</i>  | MSMEG4925                    | ATP synthase delta chain                        | -0.741         | 0.0024  | 7                  |
| ML0990                   |              | MSMEG2732                    | CHP                                             | -0.701         | 0.0066  | 10                 |
| glpD-a                   | <i>glpD</i>  | MSMEG6721                    | glycerol-3-phosphate dehydrogenase              | -0.683         | 0.0017  | 7                  |
| menD                     | <i>menD</i>  | MSMEG1225                    | bifunctional menaquinone biosynthesis protein   | -0.677         | 0.0072  | 7                  |
| Rv3841                   | <i>bfrB</i>  | MSMEG6385                    | bacterioferritin                                | -0.660         | 0.0062  | 7                  |

|                            |              |           |                                                                     |        |        |    |
|----------------------------|--------------|-----------|---------------------------------------------------------------------|--------|--------|----|
| bccA-c                     |              | MSMEG1807 | biotin carboxy carrier protein & biotin carboxyl transferase        | -0.641 | 0.0017 | 1  |
| purM                       | <i>purM</i>  | MSMEG5766 | phosphoribosylformylglycinamide cyclo-ligase                        | -0.635 | 0.0082 | 7  |
| fas                        | <i>fas</i>   | MSMEG0552 | fatty acid synthase                                                 | -0.633 | 0.0015 |    |
| lpqF                       | <i>lpqF</i>  | MSMEG6050 | probable conserved lipoprotein                                      | -0.617 | 0.0062 | 3  |
| ML0759                     | <i>fbiA</i>  | MSMEG1829 | probable F420 biosynthesis protein                                  | -0.611 | 0.0015 | 7  |
| gabD-y                     | <i>gabD</i>  | MSMEG1497 | succinate-semialdehyde dehydrogenase                                | -0.600 | 0.0075 | 7  |
| glnA2-f                    | <i>glnA2</i> | MSMEG2596 | probable glutamine synthetase                                       | -0.593 | 0.0026 | 7  |
| ML1094                     |              | MSMEG1104 | short chain type dehydrogenase/ reductase                           | -0.590 | 0.0024 | 7  |
| ML0596-a                   | <i>csd</i>   | MSMEG4531 | probable cysteine desulfurase                                       | -0.576 | 0.0020 | 7  |
| ML2203                     |              | MSMEG3807 | CHP                                                                 | -0.552 | 0.0020 | 10 |
| ML2289                     |              | none      | CHP                                                                 | -0.537 | 0.0020 | 10 |
| sdhC                       | <i>sdhC</i>  | MSMeg1669 | succinate dehydrogenase                                             | -0.528 | 0.0082 | 7  |
| lysX                       | <i>lysX</i>  | MSMEG6531 | lysyl-tRNA synthetase                                               | -0.501 | 0.0070 | 2  |
| phoT                       | <i>phoT</i>  | MSMEG2124 | phosphate transport ATP-binding protein                             | -0.496 | 0.0066 | 3  |
| ML2053                     | <i>adhA</i>  | MSMEG0251 | probable alcohol dehydrogenase                                      | -0.477 | 0.0041 | 7  |
| uvrD2                      | <i>uvrD2</i> | MSMEG1956 | ATP-dependent DNA helicase                                          | -0.476 | 0.0051 | 2  |
| gabD-e                     | <i>gabD</i>  | MSMEG6662 | aldehyde dehydrogenase family protein                               | -0.469 | 0.0062 | 7  |
| folK                       | <i>folK</i>  | MSMEG6064 | 2-amino-4-hydroxy-6-hydroxymethyldihydropteridine pyrophosphokinase | -0.443 | 0.0071 | 7  |
| miaA                       | <i>miaA</i>  | MSMEG6675 | probable tRNA delta(2)-isopentenylpyrophosphate transferase         | -0.383 | 0.0100 | 7  |
| <b>Downregulated genes</b> |              |           |                                                                     |        |        |    |
| lytB2                      | <i>lytB</i>  | MSMEG5208 | probable LytB-related protein, LytB2                                | 3.316  | 0.0002 | 3  |
| xseA                       | <i>xseA</i>  | MSMEG5210 | exo-deoxyribonuclease VII, large subunit                            | 2.737  | 0.0003 | 2  |
| ML2088-a                   |              | MSMEG4807 | putative cytochrome P450                                            | 2.039  | 0.0004 | 7  |
| ctpC-a                     |              | MSMEG5384 | cadmium-translocating P-type ATPase                                 | 1.789  | 0.0081 | 3  |

|          |              |           |                                                    |       |        |    |
|----------|--------------|-----------|----------------------------------------------------|-------|--------|----|
| rpoT     | <i>sigA</i>  | MSMEG2759 | RNA polymerase sigma factor, SigA                  | 1.513 | 0.0000 | 2  |
| rplE     | <i>rplE</i>  | MSMEG1464 | ribosomal protein L5                               | 1.198 | 0.0002 | 2  |
| ML2661-e | <i>fadD7</i> | MSMEG3702 | Fatty acid CoA ligase, FadD7                       | 1.197 | 0.0051 | 1  |
| fpg      | <i>fpg</i>   | MSMEG2417 | formamidopyrimidine-DNA glycosylase                | 0.961 | 0.0078 | 7  |
| ML1750   |              | MSMEG2202 | CHP                                                | 0.922 | 0.0098 | 10 |
| uvrB     | <i>uvrB</i>  | MSMEG3820 | excinuclease ABC, B subunit                        | 0.843 | 0.0057 | 2  |
| Rv1009   | <i>rpfB</i>  | MSMEG5419 | probable resuscitation-promoting factor B, RpfB    | 0.835 | 0.0027 | 3  |
| uspE     | <i>uspB</i>  | MSMEG4462 | probable sugar ABC transporter                     | 0.810 | 0.0024 | 3  |
| ML0115   |              | MSMEG6327 | CHP                                                | 0.807 | 0.0051 | 10 |
| ML2661-h | <i>fadD7</i> | MSMEG4041 | Fatty acid CoA ligase, FadD7                       | 0.805 | 0.0002 | 1  |
| Rv2393   |              | MSMEG4522 | CHP                                                | 0.771 | 0.0041 | 10 |
| ML2491-c |              | MSMEG4370 | CHP                                                | 0.760 | 0.0033 | 10 |
| ML0815   |              | MSMEG1939 | transcriptional regulator, TetR family domain      | 0.725 | 0.0002 | 9  |
| rpsL     | <i>rpsL</i>  | MSMEG1393 | ribosomal protein S12                              | 0.724 | 0.0066 | 2  |
| ML0691-b | <i>dacB</i>  | MSMEG1659 | probable D-alanyl-alanine carboxypeptidase         | 0.720 | 0.0005 | 3  |
| ML0729   |              | MSMEG1810 | CHP                                                | 0.674 | 0.0039 | 10 |
| ML0093   | <i>glfT</i>  | MSMEG5323 | bifunctional UDP-galactofuranosyl transferase      | 0.668 | 0.0085 | 3  |
| gatA-b   | <i>gatA</i>  | MSMEG1078 | probable glutamyl-tRNA (GLN) amidotransferase      | 0.668 | 0.0024 | 2  |
| atpD-c   | <i>atpD</i>  | MSMEG4939 | probable ATP synthase Beta chain                   | 0.660 | 0.0009 | 7  |
| trpS     | <i>trpS</i>  | MSMEG1655 | tryptophanyl-tRNA synthetase                       | 0.655 | 0.0020 | 2  |
| mce1A-a  | <i>mce1A</i> | MSMEG6500 | host cell invasion                                 | 0.650 | 0.0026 | 0  |
| ML2549   |              | MSMEG0428 | CHP                                                | 0.628 | 0.0029 | 10 |
| ML2620-b | <i>mmpL3</i> | MSMEG4733 | possible conserved transmembrane transport protein | 0.624 | 0.0024 | 3  |
| pdc-a    | <i>pdc</i>   | MSMEG4455 | probable pyruvate decarboxylase                    | 0.590 | 0.0027 | 7  |
| ML1115   | <i>lprB</i>  | MSMEG1390 | possible lipoprotein                               | 0.581 | 0.0031 | 3  |
| ML0174   | <i>mprA</i>  | MSMEG5468 | DNA-binding response regulator (persistence)       | 0.580 | 0.0016 | 9  |
| umaA2-a  | <i>umaA</i>  | MSMEG1199 | possible mycolic acid synthase                     | 0.476 | 0.0041 | 1  |

|          |              |           |                                        |       |        |   |
|----------|--------------|-----------|----------------------------------------|-------|--------|---|
| ML1698   |              | MSMEG5185 | conserved membrane protein             | 0.464 | 0.0033 | 3 |
| ML2140   |              | MSMEG5666 | transcriptional regulator, marR family | 0.460 | 0.0070 | 9 |
| ML2377   | <i>mmpS4</i> | MSMEG0373 | conserved membrane protein             | 0.455 | 0.0073 | 3 |
| ML0243-b | <i>pks16</i> | MSMEG5415 | putative polyketide synthase           | 0.440 | 0.0081 | 1 |
| ung      | <i>ung</i>   | MSMEG3668 | probable uracil-DNA glycosylase        | 0.422 | 0.0079 | 2 |

<sup>a</sup> Gene identifier as defined in the MIAME compliance file (<http://vbc.med.monash.edu.au/~powell/M.smegmatis>).

<sup>b</sup> TIGR annotation (<http://www.tigr.org/tigr-scripts/CMR2/CMRHomePage.spl>)

<sup>c</sup> Function as per Tuberculist and Leproma (<http://genolist.pasteur.fr>).

<sup>d</sup> Log<sub>2</sub> of the fold ratio

<sup>e</sup> Functional classification as per Tuberculist and Leproma. 1, Lipid metabolism; 2, Information pathways; 3, Cell wall & cell processes; 6, PE/PPE; 7, Intermediary metabolism & respiration; 9, Regulatory proteins; 10, Conserved hypotheticals.
